# Supplementary material
Source: PubMed Central journal article supplement (PMC3293649)
Supplement: supp_blood-2011-10-384560_Document1.pdf [file supp_blood-2011-10-384560_Document1.pdf]

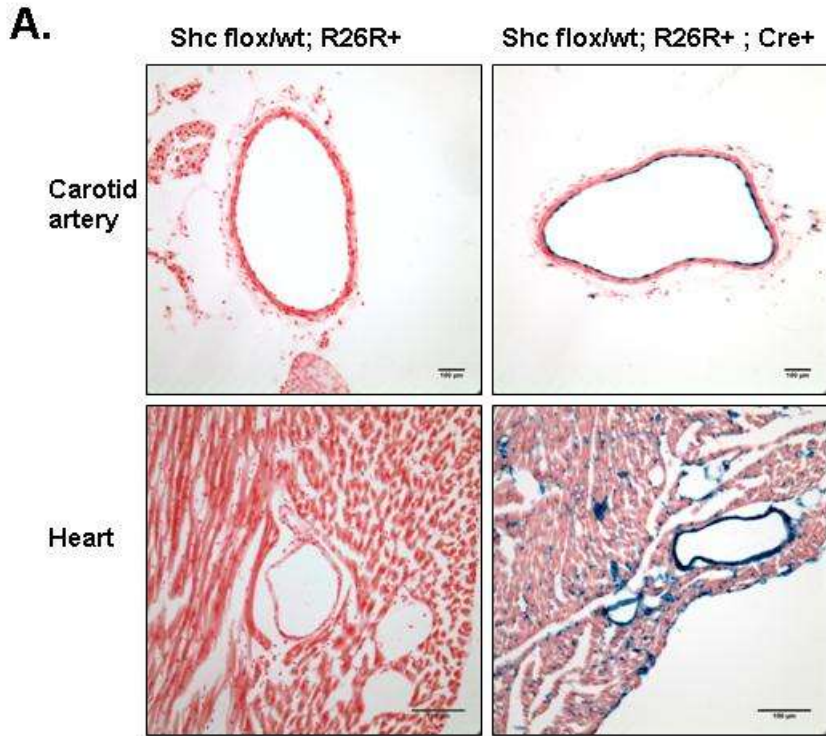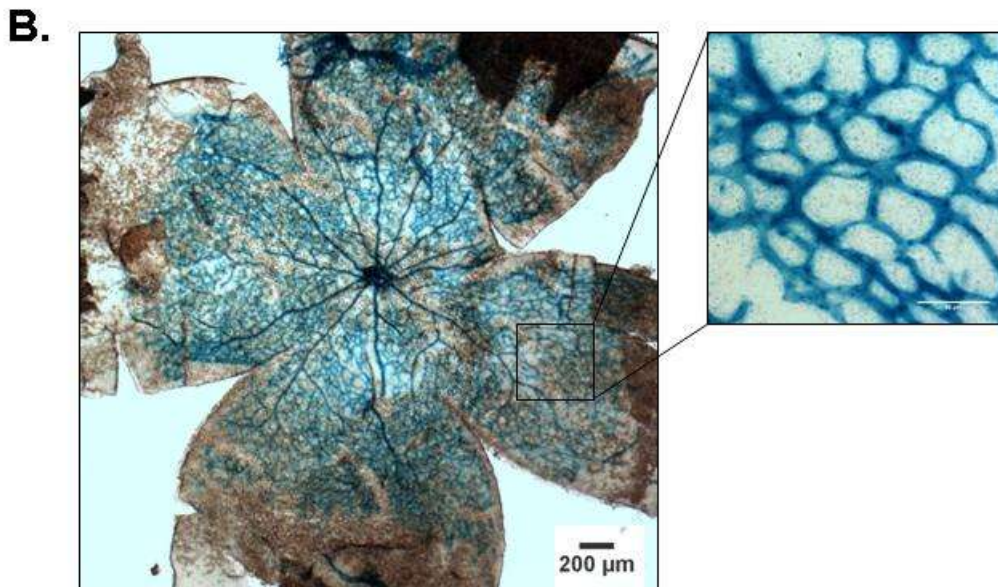

**Figure S1. *Shc* knockout is restricted to ECs in *Shcflox/flox; Tie2-Cre+* mice** (A) To confirm that *Shc* gene excision was restricted to endothelial cells, *Shcflox/flox; Tie2-Cre+* males were crossed to Rosa26Reporter mice to yield *Shcflox/WT; Tie2-Cre+; R26R* animals. Heart and arteries were isolated and sections were stained with X-Gal and counterstained with Nuclear Fast Red. (B) Retinas were isolated from P5 pups were stained with X-gal to visualize Tie2-Cre expression in the retina.

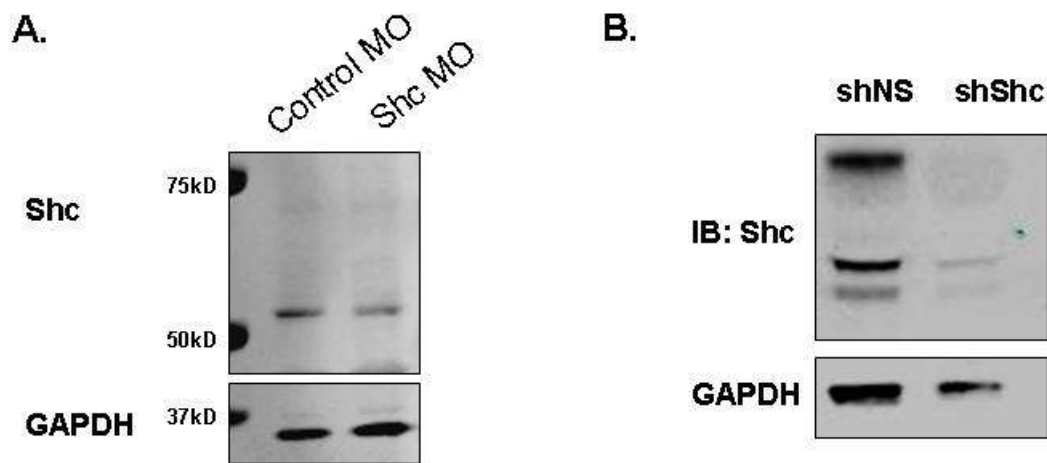

**Figure S2. Shc knockdown in zebrafish and HUVECs**

(A) Shc is expressed as a single isoforms of approximately 52 kDa in zebrafish. Total cell lysate from 48 hpf zebrafish embryos were analyzed by western blot to confirm Shc depletion by Shc-MO injection. (B) Lentivirus-mediated Shc knockdown in HUVEC. HUVEC infected with lentivirus expressing short hairpin RNA against Shc (shShc) or a non-specific target (shNS) were lysed and immunoblotted to confirm efficient Shc knockdown.

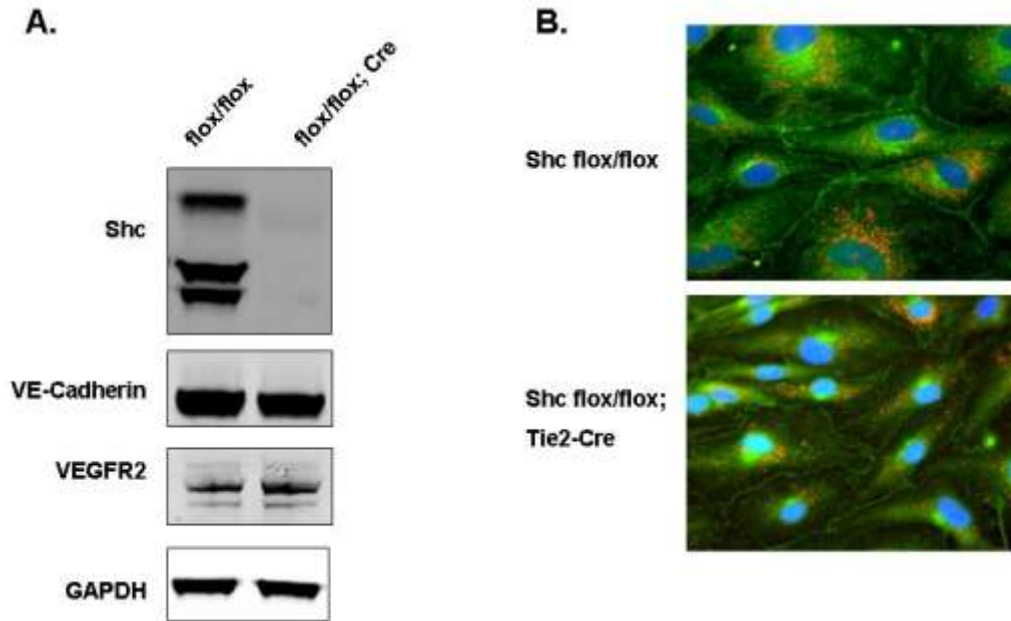

**Figure S3. Validation of mouse lung endothelial cells (MLECs)**

(A) Endothelial cells were isolated from P6-P9 pups using CD31-coated Dynabeads to select for PECAM-positive cells. Cell lysates were separated using SDS-PAGE and immunoblotted for Shc, GAPDH, VE-Cadherin and VEGFR-2 to confirm Shc knockout in ECs from *Shcflox/flox; Tie2-Cre*<sup>+</sup> mice. Similar results were obtained from 4 different clones per genotype. (B) Immunofluorescence staining shows expression and proper localization of PECAM-1 (green) and Ac-LDL (red) uptake by MLECs.

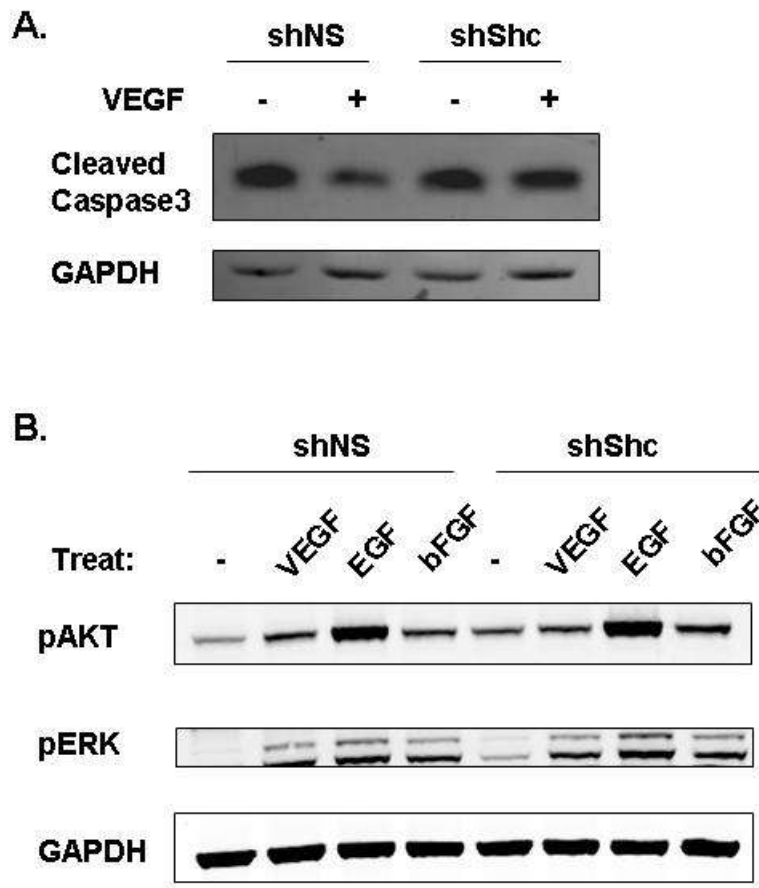

**Figure S4. Shc is required for VEGF-induced survival and requirement for Shc in Akt activation is specific to VEGF signaling**

(A) Lentivirus infected HUVECs were grown to confluence on FN coated plates and then serum starved for 24 hrs with or without 100ng/ml VEGF to induce apoptosis. Cells were lysed and 50ug total protein was loaded onto an SDS-PAGE gel. Lysates were immunoblotted for cleaved caspase 3, a well characterized marker and executor of apoptosis, and GAPDH as a loading control. (B) To assay the specificity of Shc in signaling activated by VEGF and other growth factors in ECs, HUVECs were serum starved 4 hrs to reduce basal signaling and then treated for 5 min with 100ng/ml VEGF, 100ng/ml EGF, 100ng/ml bFGF or vehicle. Cell lysates were immunoblotted for phos-Akt, phos-ERK, and GAPDH.
